# Supplementary material for: Anthropogenic Fine Particulate Matter Pollution Will Be Exacerbated in EasternChina Due to 21 st -Century GHG Warming
Source: Copernicus journal article supplement (doi:10.5194/acp-2018-761), 2018-08-13
Supplement: Supplementary file 1 [file acp-2018-761-supplement.pdf]

Supplementary information for

**Anthropogenic Fine Particulate Matter Pollution Will Be Exacerbated in Eastern  
China Due to 21<sup>st</sup>-Century GHG Warming**

Huopo Chen<sup>1,2\*</sup>, Huijun Wang<sup>2,1</sup>, Jianqi Sun<sup>1,2</sup>, Yangyang Xu<sup>3</sup>, and Zhicong Yin<sup>2</sup>

<sup>1</sup> *Nansen-Zhu International Research Centre, Institute of Atmospheric Physics,*

*Chinese Academy of Sciences, Beijing, China*

<sup>2</sup> *Collaborative Innovation Center on Forecast and Evaluation of Meteorological*

*Disasters, Nanjing University for Information Science and Technology, Nanjing,*

*China*

<sup>3</sup> *Department of Atmospheric Sciences, Texas A&M University, College Station Texas,*

*USA*

**Corresponding author:** Huopo Chen ([chenhuopo@mail.iap.ac.cn](mailto:chenhuopo@mail.iap.ac.cn))

**Address:** Nansen-Zhu International Research Centre, Institute of Atmospheric  
Physics, Chinese Academy of Sciences, PO Box 9804, Beijing 100029,  
China

**Email:** [chenhuopo@mail.iap.ac.cn](mailto:chenhuopo@mail.iap.ac.cn)

**Tel:** (+86)010-82995057

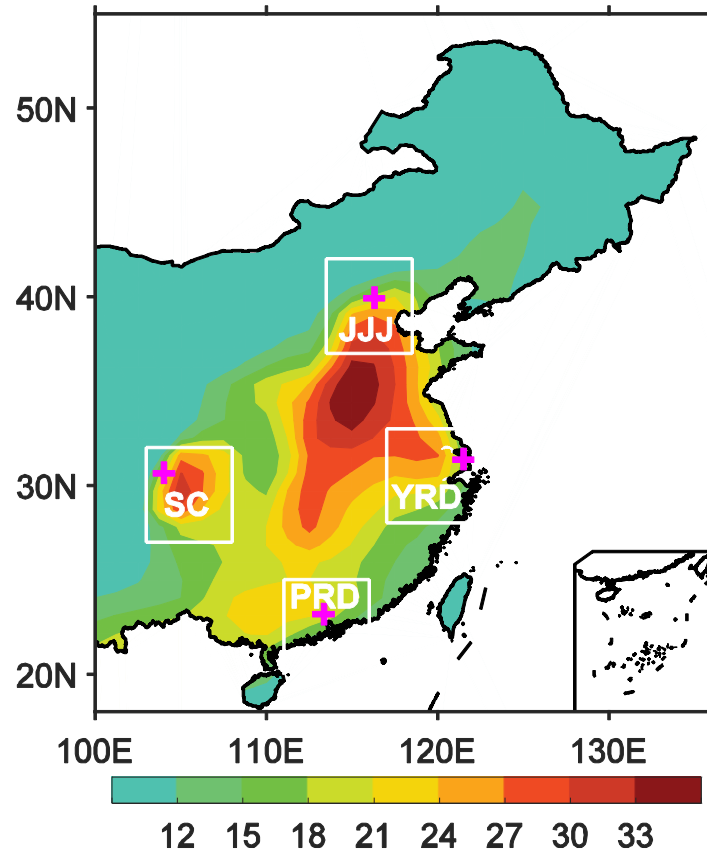

**Figure S1.** The simulated total PM<sub>2.5</sub> surface concentration (including sulfate, black carbon, primary organic matter, and secondary organic aerosols) during the years of 2006-2015 from RCP8.5\_FixAerosol2005 experiment by CESM1. The boxes with 5° longitude by 5° latitude represent the four economic zones in China (JJJ: Beijing-Tianjin-Hebei; YRD: lower reach of Yangtze River valley; PRD: Pearl River Valley; SC: Sichuan basin), in which the changes of air pollutions will be deeply discussed in the text. Units: µg/m<sup>3</sup>.

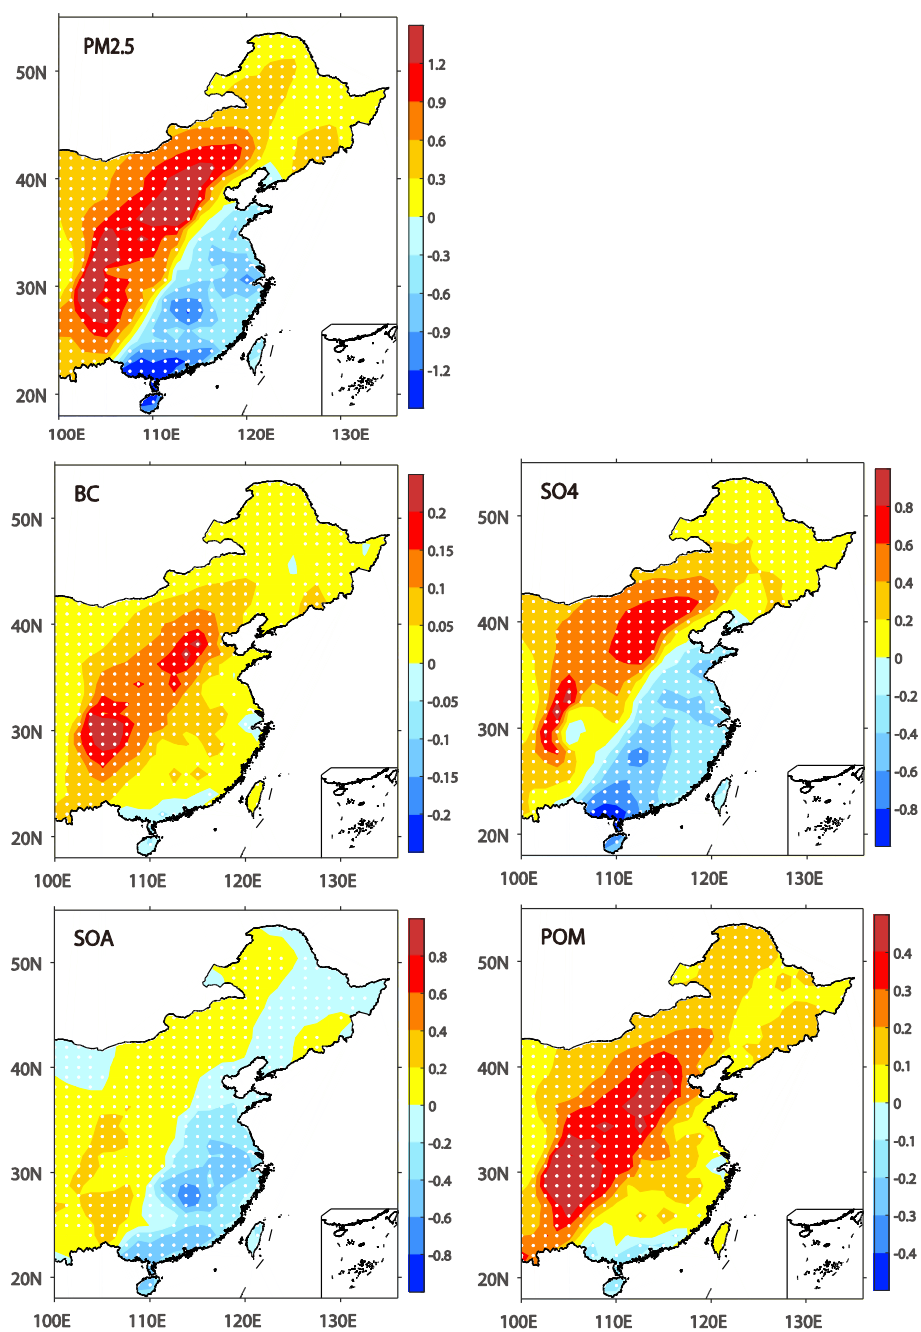

**Figure S2.** Simulated linear trends of the total PM<sub>2.5</sub> surface concentration as well as its associated species (BC, SO<sub>4</sub>, SOA, and POM) across eastern China for the years of 2006-2099. The linear trends are calculated by the nonparametric Mann-Kendall and Sen's methods, and the significant trends with 0.01 significant level are illustrated by dots. Units:  $\mu\text{g}/\text{m}^3/100\text{a}$ .

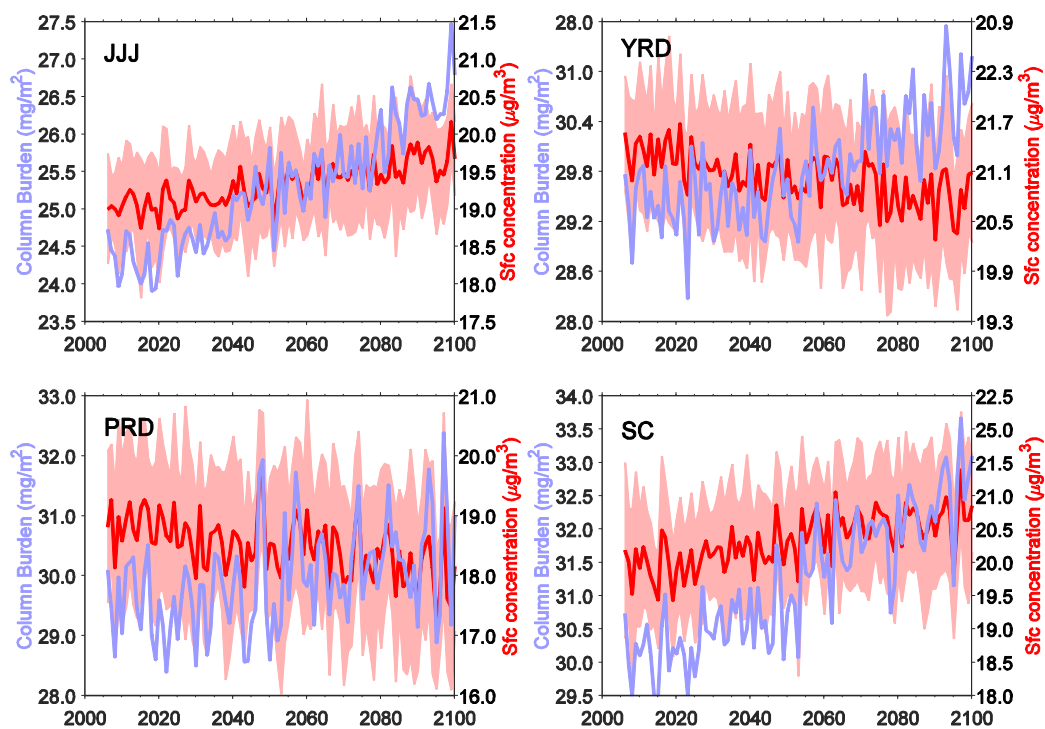

**Figure S3.** Plots of future changes of total PM<sub>2.5</sub> loadings averaged over four economic zones in China, including JJJ, YRD, PRD, and SC, in term of the surface concentration ( $\mu\text{g}/\text{m}^3$ , right axis in red) and column burden ( $\text{mg}/\text{m}^2$ , left axis in blue) from the simulations of RCP8.5\_FixAerosol2005 experiment. Ensemble variance (1 sigma) for surface concentration is shown in red shadings.

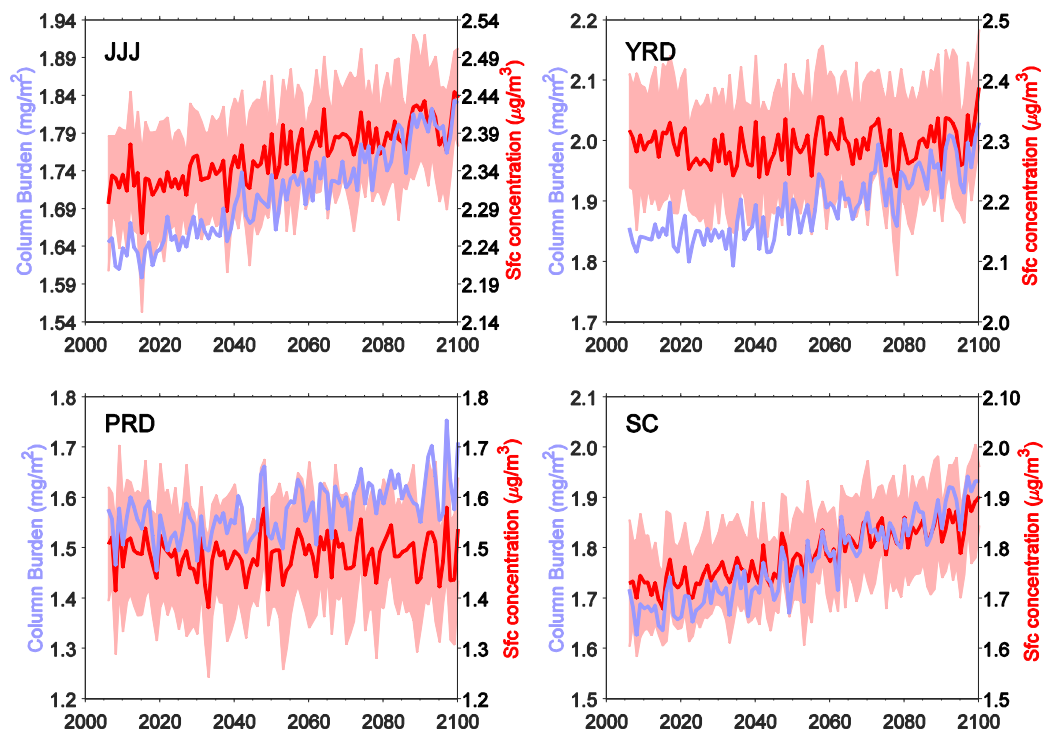

**Figure S4.** Similar to Figure S3 but for the BC.

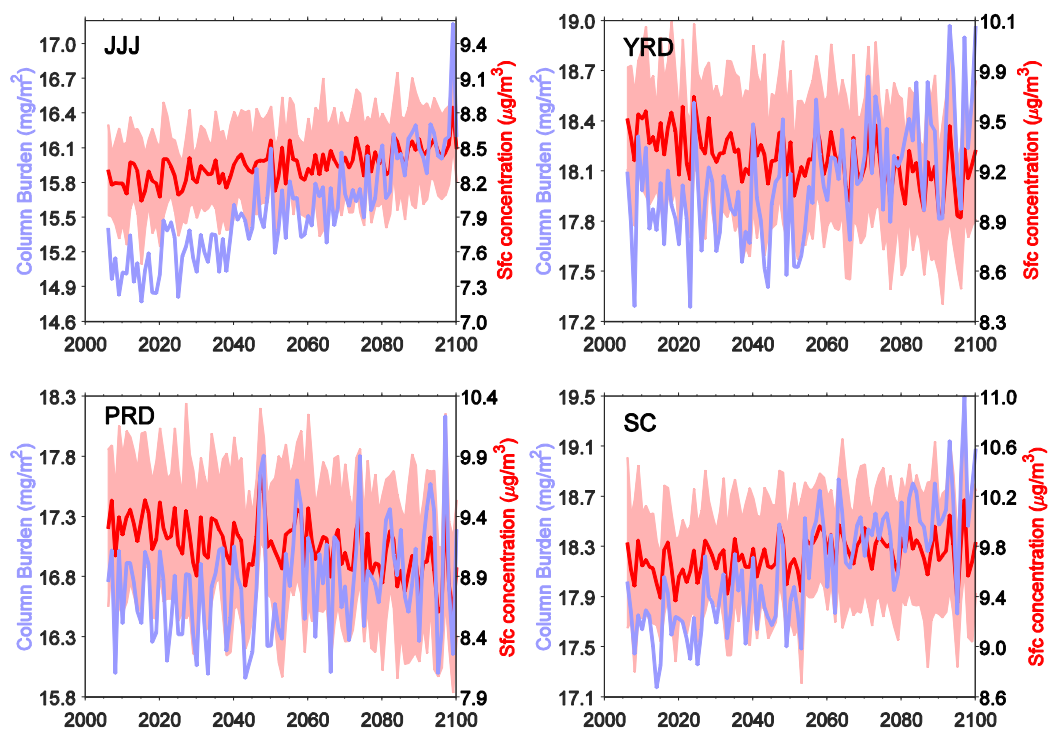

**Figure S5.** Similar to Figure S3 but for the  $\text{SO}_4$ .

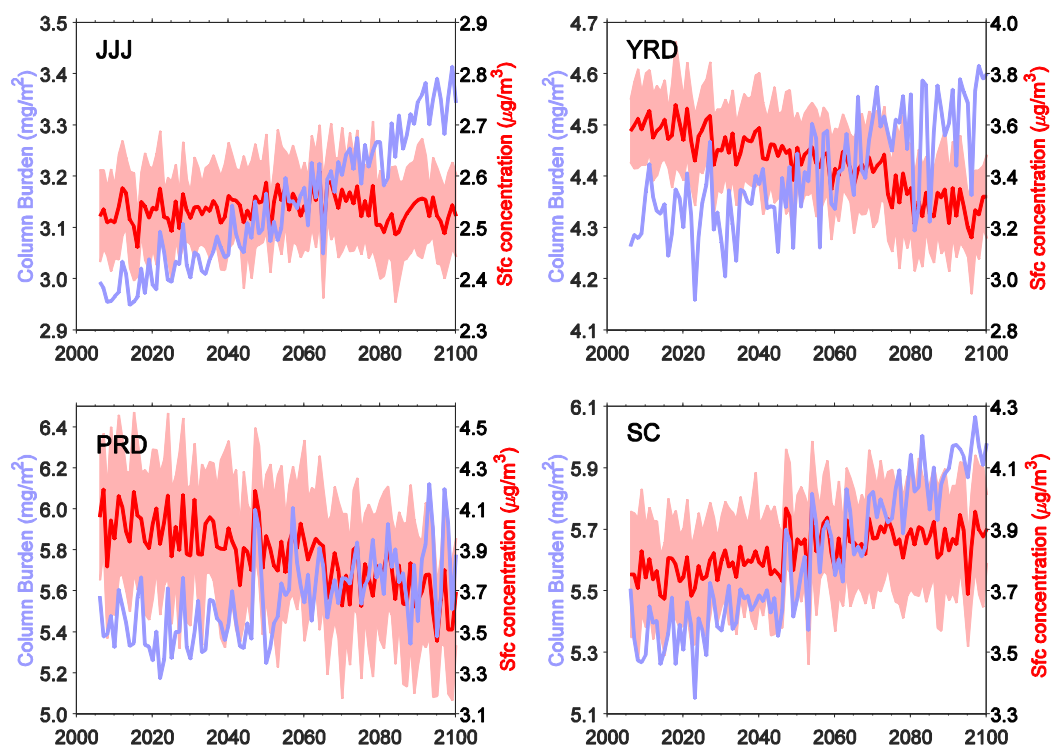

**Figure S6.** Similar to Figure S3 but for the SOA.

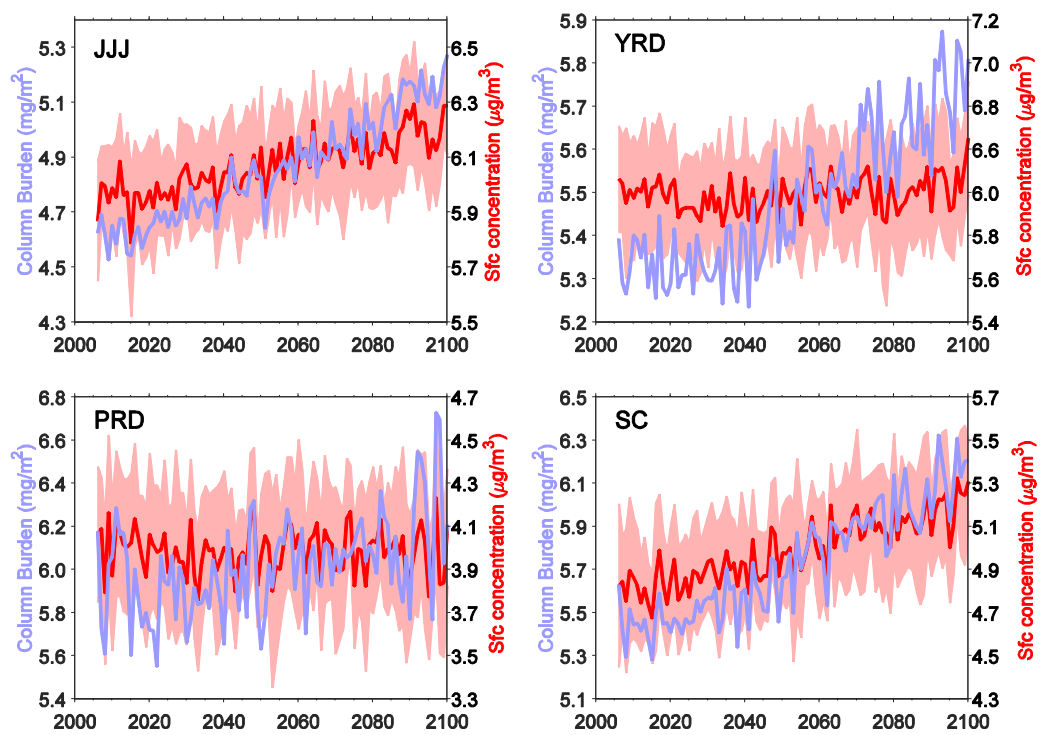

**Figure S7.** Similar to Figure S3 but for the POM.



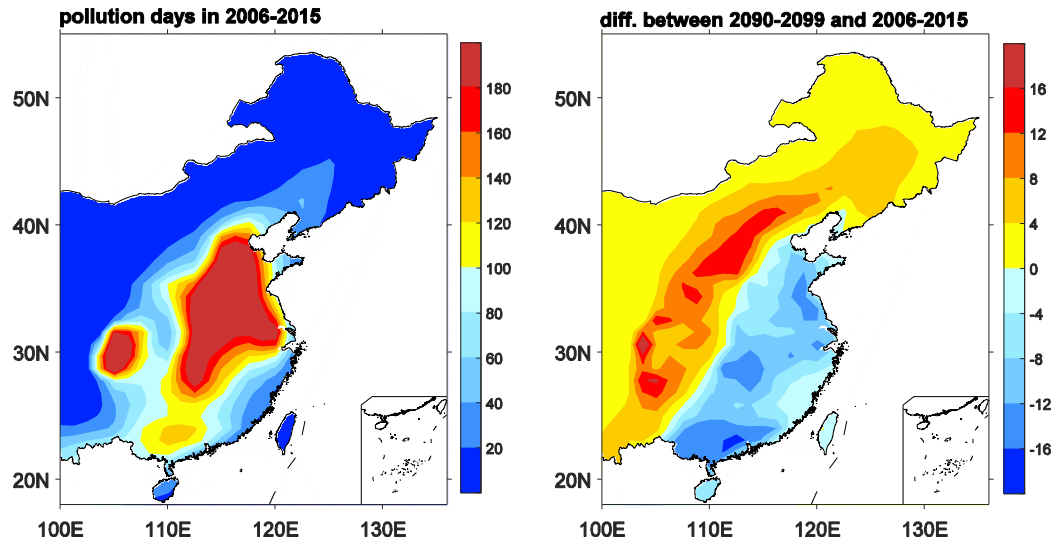

**Figure S8.** Changes of the anthropogenic PM<sub>2.5</sub> pollution days ( $> 25 \mu\text{g}/\text{m}^3$ ) across eastern China from the RCP8.5\_FixAerosol2005 experiment. Left panel illustrates the annual averaged air pollution days in 2006-2015 and right panel shows changes of the pollution days at the end of 21<sup>st</sup> century with respect to 2006-2015. Units: days.
